# Supplementary material for: Puberty health intervention to improve menstrual health and school attendance among adolescent girls in The Gambia: study methodology of a cluster-randomised controlled trial in rural Gambia (MEGAMBO TRIAL)
Source: Springer Nature journal article supplement (doi:10.1186/s12982-022-00114-x), 2022-07-16
Supplement: MOESM3 [file 23275054]

# Main Study Wash Spotcheck

---

Study ID: \_\_\_\_\_

## SECTION 1: School Facilities Observations

---

1.1 - Observers name

- Vishna Shah  
 Isatou Jammeh  
 Tida Samateh

---

1.2 - Date

\_\_\_\_\_

---

1.3 - Visit:

- Start  
 Middle  
 End

---

1.4 - Total number of girls

\_\_\_\_\_

---

1.5 - Total number of boys

\_\_\_\_\_

---

1.6 - Total number of female teachers

\_\_\_\_\_

---

1.7 - Total number of male teachers

\_\_\_\_\_

---

1.8 - Does the school have any sanitary pads supply?

- Yes  
 No

---

1.9 - Number of disposal sanitary pads at visit

\_\_\_\_\_

---

1.10 - Date of last sanitary pad delivery

\_\_\_\_\_

---

The date should be before the date of observation, not after, usually max 2 years before the date of observation.

---

1.11 - Number of disposal sanitary pads supplied by government

\_\_\_\_\_

---

1.12 - Number of disposal sanitary pads left when you got the last delivery

\_\_\_\_\_

**SECTION 2: Sanitation Observations**

2.1 - Are there toilets/latrines at the school?

- Yes  
 No

2.2 - Type of latrines in school

- Ventilated improved pit latrine (VIP)  
 Flush/pour flush latrine  
 Pit latrine with slab  
 Pit latrine without slab

2.3 - How many blocks they are?

a) Total

\_\_\_\_\_

b) Girls

\_\_\_\_\_

c) Boys

\_\_\_\_\_

d) Mix

\_\_\_\_\_

e) Teachers

\_\_\_\_\_

2.4 - Where are the latrines located?

- Near the classrooms  
 A private space away from the classroom

2.5 - Are girls and boys blocks adjacent to each other?

- Yes  
 No

**SECTION 3:****3.1 - Fill the table below:**

a) Total number of cubicles per block:

\_\_\_\_\_

b) Locked

\_\_\_\_\_

c) Functional

\_\_\_\_\_

e) Light

\_\_\_\_\_

d) Clean

\_\_\_\_\_

f) Full door

\_\_\_\_\_

g) Partial door

\_\_\_\_\_

---

h) Lock inside

---

---

i) Lockable

---

---

j) Roof

---

---

k) Walls high

---

---

l) Bins inside

---

---

m) Water Inside

---

---

a) Total number of cubicles per block:

---

---

b) Locked

---

---

c) Functional

---

---

d) Clean

---

---

e) Light

---

---

f) Full door

---

---

g) Partial door

---

---

h) Lock inside

---

---

i) Lockable

---

---

j) Roof

---

---

k) Walls high

---

---

l) Bins inside

---

---

m) Water Inside

---

---

a) Total number of cubicles per block:

---

---

b) Locked

---

---

c) Functional

---

---

d) Clean

---

---

e) Light

---

---

f) Full door

---

---

g) Partial door

---

---

h) Lock inside

---

---

i) Lockable

---

---

j) Roof

---

---

k) Walls high

---

---

l) Bins inside

---

---

m) Water Inside

---

---

a) Total number of cubicles per block:

---

---

b) Locked

---

---

c) Functional

---

---

d) Clean

---

---

e) Light

---

---

f) Full door

---

---

g) Partial door

---

---

h) Lock inside

---

---

i) Lockable

---

---

j) Roof

---

---

k) Walls high

---

---

l) Bins inside

---

---

m) Water Inside

---

---

a) Total number of cubicles per block:

---

---

b) Locked

---

---

c) Functional

---

---

d) Clean

---

---

e) Light

---

---

f) Full door

---

---

g) Partial door

---

---

h) Lock inside

---

---

i) Lockable

---

j) Roof

---

k) Walls high

---

l) Bins inside

---

m) Water Inside

---

3.2 - Enter number of latrines/toilets for each category

#### SECTION 4: Menstrual Absorbent Disposal

4.1 - At the time of the visit, did you see a bin for disposing used menstrual blood absorbents?

- Yes  
 No

4.2 - If yes, where were they present?

- Inside all cubicles  
 Inside some cubicles  
 Outside the block

4.3 - At the time of the visit, did you see a pit for burning used menstrual blood absorbents?

- Yes  
 No

#### SECTION 5: Hand-Washing Observations

5.1 - Does the school have hand-washing facilities?

- Yes  
 No

5.2 - What kind of hand-washing facilities does the school have?

- Running water from a piped system or tank  
 Hand-poured water system (bucket or ladle)  
 Basin/bucket (hand-washing done in the water and is not running or poured)  
 Other

5.3 - Specify other hand washing facility

---

5.4 - How many hand washing facilities are located outside (but within school grounds)?

---

5.5 - How many hand washing facilities are located inside/close to the classrooms?

---

5.6 - Is there handwashing facilities close to the toilet block?

- Yes  
 No

5.7 - Do you find soap on the hand-washing facilities?

- Almost always  
 In some of them  
 No soap at all

**SECTION 6: Water Access Observations**

6.1 - Is there water available in the school?

- Yes  
 No

6.2 - What are the sources of water available at school?

- Piped water into school building  
 Piped water to schoolyard  
 Surface water (river, lake, stream)  
 Cart with small tank/water tank/jerrican  
 Public tap/standpipe  
 Tube well/borehole  
 Protected well/spring  
 Unprotected well/spring  
 Rainwater collection  
 Other source, specify  
 (Select all that apply)

6.3 - Specify other water availability

\_\_\_\_\_

6.4 - What is the main water source available at the school?

- Piped water into school building  
 Piped water to schoolyard  
 Surface water (river, lake, stream)  
 Cart with small tank/water tank  
 Public tap/standpipe  
 Tube well/borehole  
 Protected well/spring  
 Unprotected well/spring  
 Rainwater collection  
 Other

6.5 - Specify other main water source

\_\_\_\_\_

6.6 -  Is there always water available at the main source of water

- All the time  
 Few hours in the morning  
 Few hours in the afternoon  
 Few days per week  
 Not available  
 Other

6.7 - Specify other times water is available at the main source

\_\_\_\_\_

6.8 - At the time of the visit, was the main water source functional?

- Yes  
 No

6.9 - Was water available around the toilets?

- Yes  
 No

6.10 - Why is there no water around the toilets?

\_\_\_\_\_

6.11 - What type of water was available around the toilet?

- Piped water  
 Bucket stores  
 Tippy tap  
 (mark all that applies)

---

6.12 - Where was the bucket provided placed?

- Near the toilet
- Near the kitchen
- Near the classrooms
- Near the water source
- Not seen
- Other

---

6.13 - Was there water in the bucket?

- Yes
- No

---

6.14 - General comments

---

---
